# Supplementary material for: Active Terahertz Beam Steering Based on Mechanical Deformation of Liquid Crystal Elastomer Metasurface
Source: Research Square preprint supplement (doi:10.21203/rs.3.rs-1939270/v1), 2022-08-25
Supplement: Supplementary file 1 [file b4fe1e513582b6d521a0a4ee.docx]

**Supplementary Information for**

**Active Terahertz Beam Steering Based on Mechanical Deformation of Liquid Crystal Elastomer Metasurface**

**Xiaolin Zhuang1**†**, Wei Zhang2**†**, Kemeng Wang1, Yangfan Gu1, Youwen An1, Xueqian Zhang1, Jianqiang Gu1*, Dan Luo2*, Jiaguang Han1 and Weili Zhang3**

*1Center for Terahertz Waves and College of Precision Instrument and Optoelectronics Engineering, Key Laboratory of Optoelectronic Information Technology, Ministry of Education of China, Tianjin University, Tianjin 300072, People’s Republic of China*

*2Department of Electrical and Electronic Engineering, Southern University of Science and Technology, Shenzhen 518055, People’s Republic of China*

*3School of Electrical and Computer Engineering, Oklahoma State University, Stillwater, OK 74078, USA*

**Corresponding author: gjq@tju.edu.cn , luod@sustech.edu.cn*

*†These authors contributed equally to this work*

**S1 Fabrication of sample**

The micron-scale metallic C-ring array on the LCE substrate was fabricated by photolithography and wet etching process, for avoiding the irrecoverable pleats on the LCE substrate during the thermal deposition as well as the curl or dissolve caused by the long-time soaking in the lift-off solution. The detailed processing flow of the fabrication is shown in Fig. S1a. First, a uniform aluminum layer with a thickness of 200 nm was evaporated on the blank LCE film by controlling the speed of thermal evaporation which avoided any bending of the LCE film and maintains good metallic layer adhesion. After that, a complementary photoresist pattern was transferred onto the aluminum layer by photolithography. Then the sample is soaked in the aluminum etching solution for 5 minutes and rinsed to remove excess aluminum. At last, the residue photoresist was removed by soaking in the developer solution. The global and microscopic graphs of the fabricated LCE metasurface sample are shown in Fig. S1b, where the sample is flexible and quite flat and the C-ring meta-atoms are in precise shape. The measured minimum line-width is 5 μm, which fully meets the design.


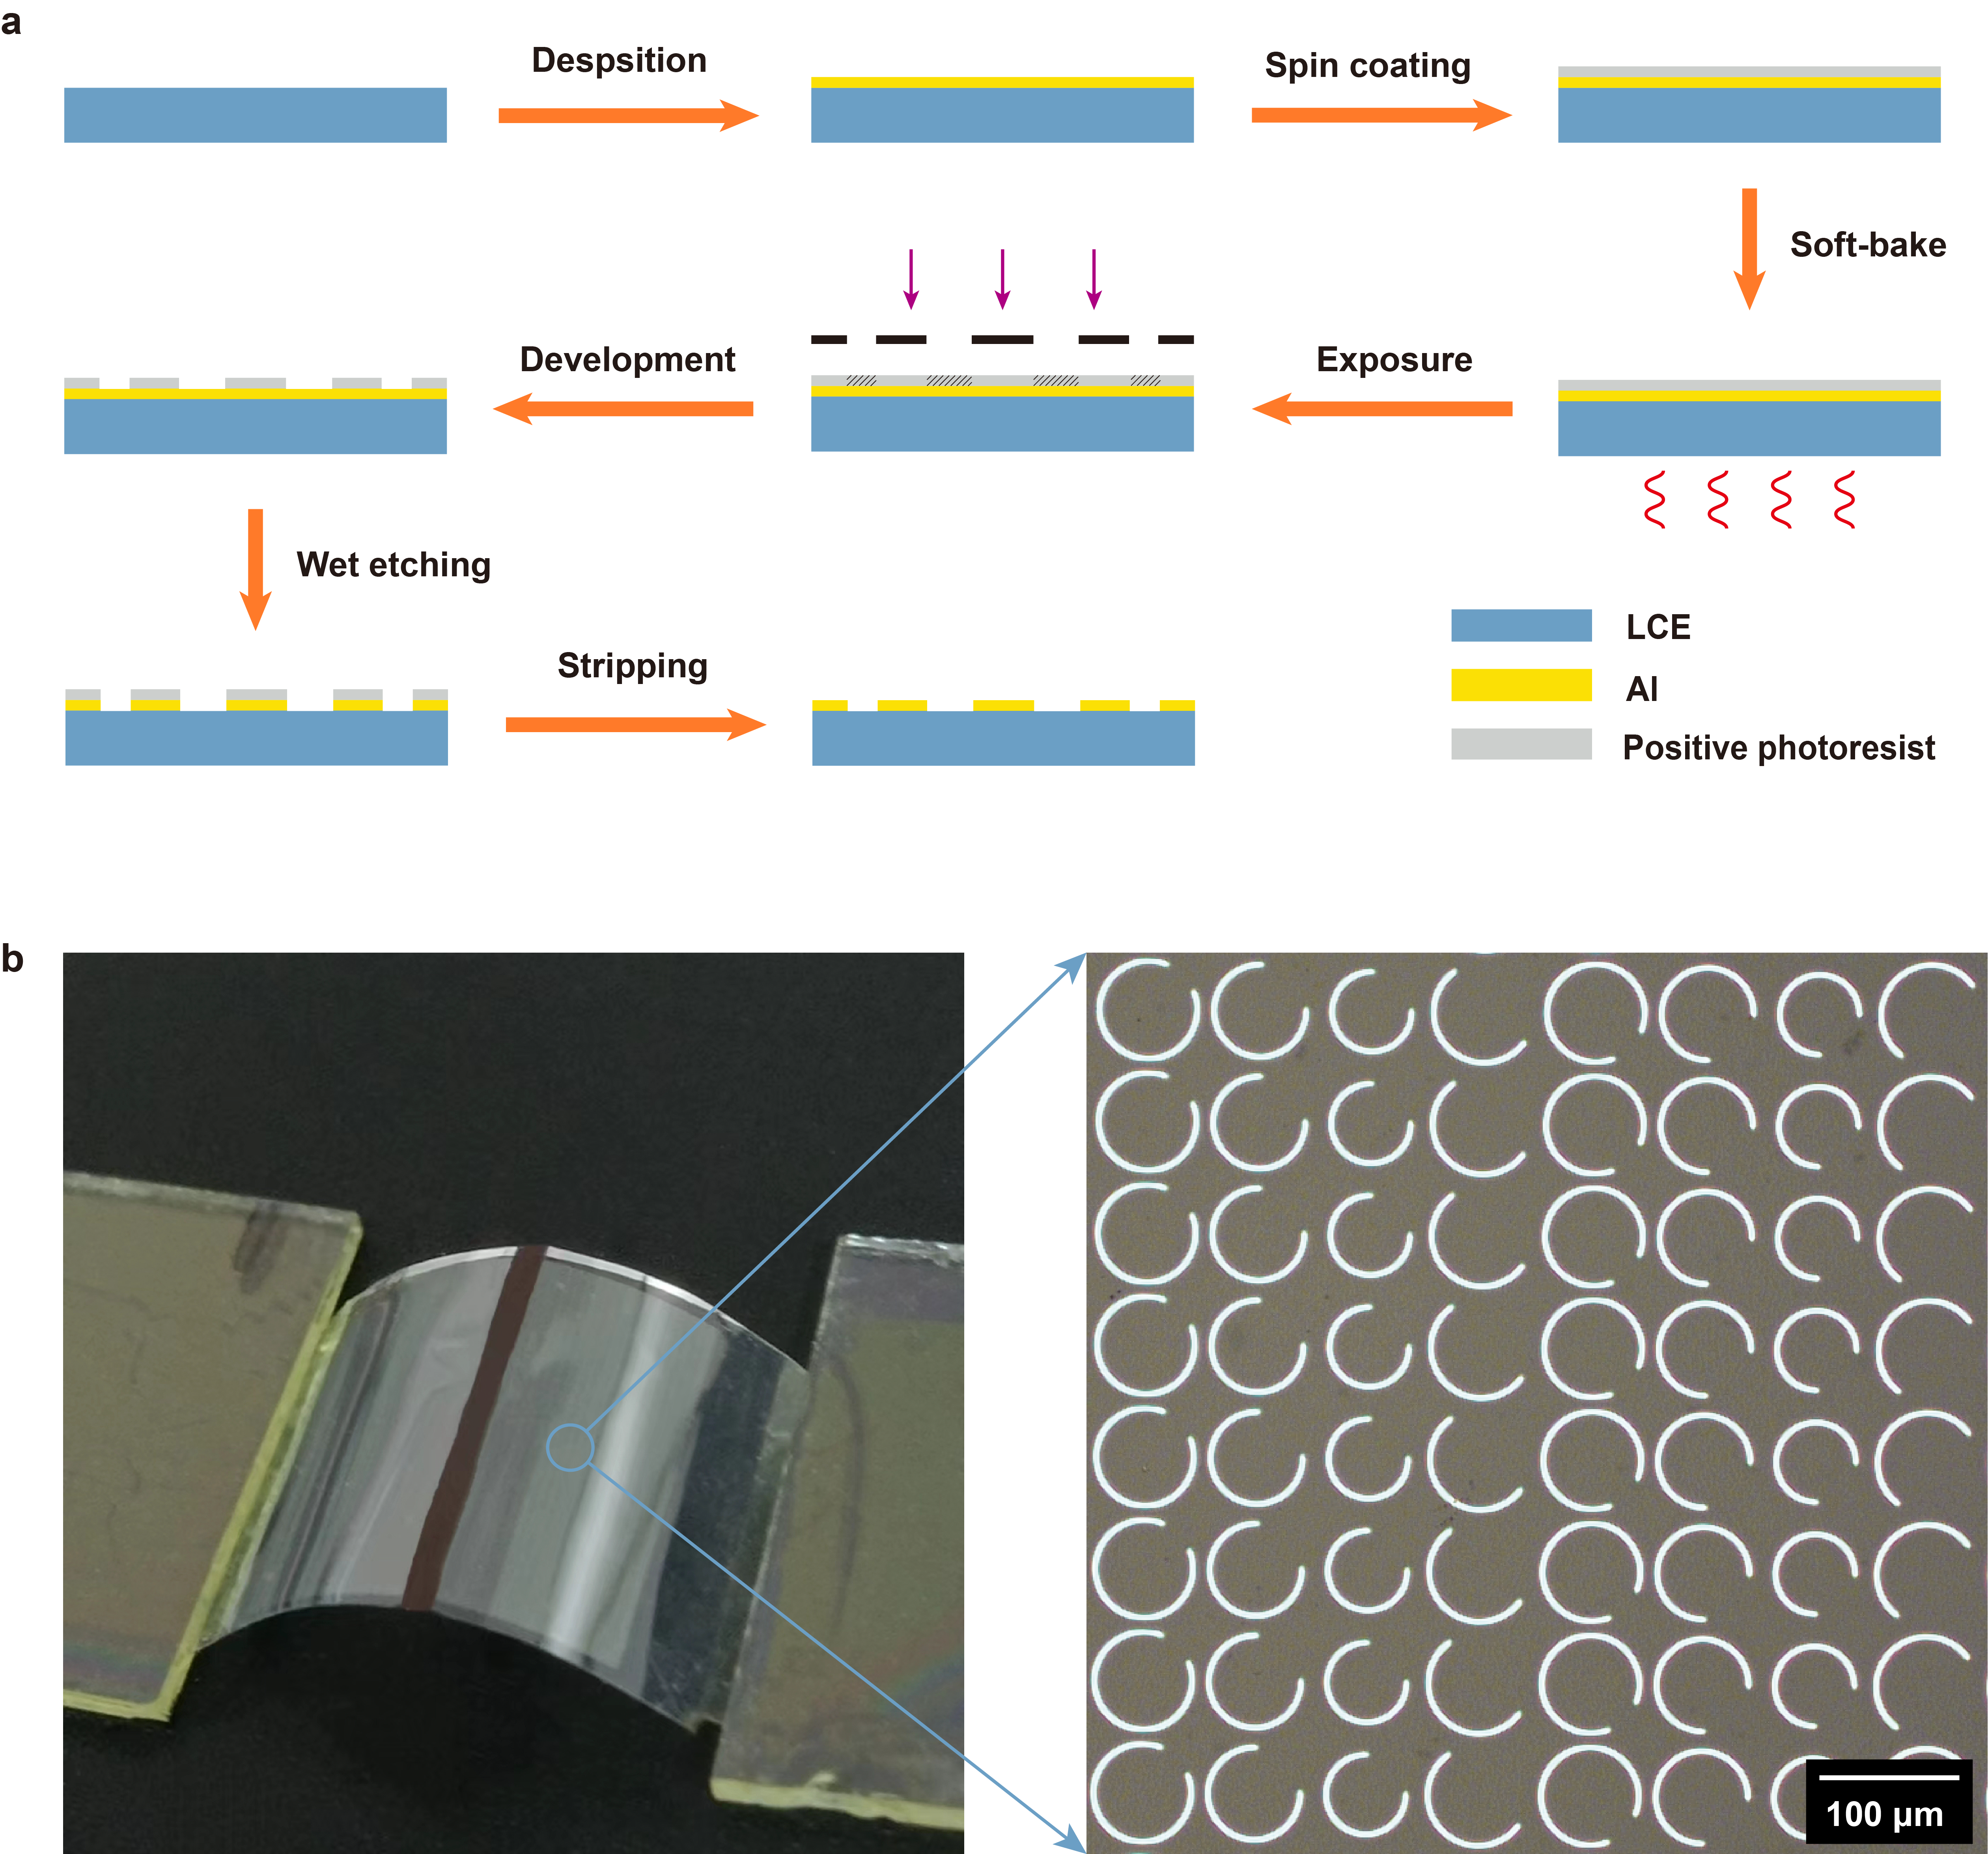


**Fig. S1 Fabrication of the LCE metasurface sample. a** Detailed fabrication process of the LCE metasurface sample. **b** The flexible LCE sample and the microscopic image of the C-ring meta-atoms. The black thick line in the middle of the LCE sample indicates the illumination position of the line-focused infrared light.

**Supplementary video 1:**

The sample is deflected upward with the spot line as the revolving axis by infrared pump, and the unilluminated part remains perfect flat.
